# Supplementary material for: Metabolic responses in the cortex and hippocampus induced by Il-15rα mutation
Source: Royal Society of Chemistry journal article supplement (doi:10.1039/d2mo00105e), 2022-08-02
Supplement: d2mo00105e1.pdf [file d2mo00105e1.pdf]

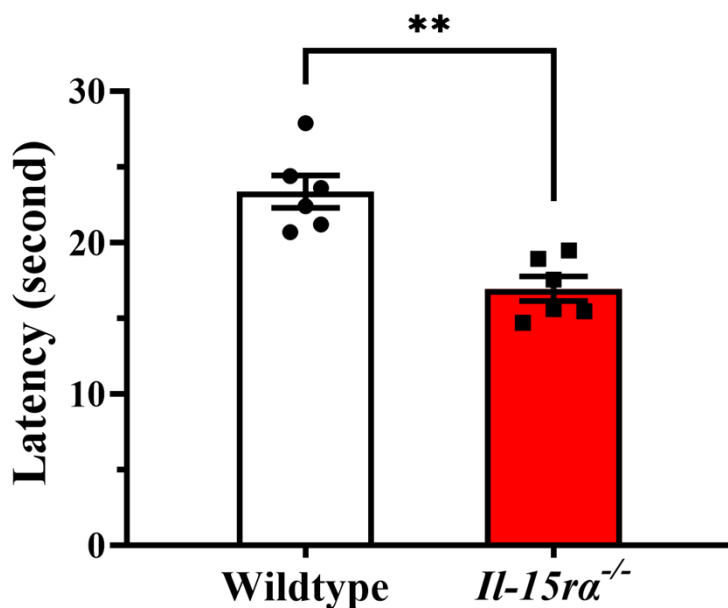

**Figure S1. Reaction time of *Il-15ra*<sup>-/-</sup> and wildtype mice in the hot plate test**

Compared with wildtype mice, *Il-15ra*<sup>-/-</sup> mice show less latency to response on the hot plate. Histograms represent the mean  $\pm$  SEM of 6 animals per group. The level of significance is calculated by two-tailed unpaired Student's t-test. \*\* $p < 0.01$ .

#### Methods

The hot plate device (SRH15-RB-200) was assigned to 50°C with a 30-second cut-off time to avoid unnecessary tissue damage. Mice were placed on the surface of hot plate and recorded for the latency to response when the first hind paw lick or foot shake or jump occurred. Tests were repeated twice at 5-min intervals and calculated the mean value.
