# Supplementary material for: Metabolic responses in the cortex and hippocampus induced by Il-15rα mutation
Source: Royal Society of Chemistry journal article supplement (doi:10.1039/d2mo00105e), 2022-08-02
Supplement: d2mo00105e2.csv [file d2mo00105e2.csv]

Peak	Group	beta-Alanine	2-hydroxypyridine	Cumic Acid	22-Ketocholesterol	glycolic acid	Maleamate	3-Aminoisobutyric acid	Aminooxyacetic acid	4-hydroxybutyrate	O-Succinylhomoserine	Dithioerythritol	valine	N-Oleoyldopamine	allose	leucine	Isoleucine	fumaric acid	2,3-Dihydroxypyridine	D-Glyceric acid	uracil	Pipecolinic acid	D-erythronolactone	L-homoserine	Aminomalonic acid	iminodiacetic acid	beta-hydroxypyruvate	nicotinamide	L-Malic acid	kyotorphin	L-cysteine	Citramalic acid	D-alanyl-D-alanine	phenylalanine	3-Hydroxyanthranilic acid	D-Arabitol	ascorbate	erythrose 4-phosphate	Galactinol	citric acid	Leucrose	5-Aminovaleric acid	mannitol	putrescine	4-hydroxycinnamic acid	xanthine	Corticosterone	Fructose 2,6-biphosphate degr prod	tryptophan
KO-COR-128	IL15RA(-/-)	10.73371525	29.78358558	4.866337121	1.184571348	18.48791788	3.843892328	4.257886299	35.72602194	0.549696933	2.287775991	0.243613377	51.58829334	2.252310942	0.849611911	117.8628583	35.25011778	43.68368993	1.946077608	15.36968469	19.20377427	0.705971108	0.340070772	0.684531696	8.544955776	1.747499692	0.755642287	32.83727826	58.07876331	1.200475088	6.737528404	5.811259148	2.3046877	2.56394106	0.766501911	2.724563482	6.711409892	0.779548782	27.66879647	3.000339733	0.236481883	2.329857124	3.721644793	0.298825312	0.161092498	7.227346195	0.104252635	9.360864352	1.316818627
KO-COR-129	IL15RA(-/-)	9.860081783	30.8128759	5.647844908	0.82105072	18.60814645	4.335820794	5.036195476	32.56726286	0.543427266	2.50312682	0.196938225	48.11100041	2.29406879	0.851363925	111.1235682	31.73609082	40.50088599	2.109239706	14.17024365	14.88027847	0.467709624	0.363507663	0.583043701	7.620753246	1.746420052	0.773841447	30.06039271	50.61760438	1.760658569	5.714326532	5.838082179	2.606832885	2.584323438	0.802577456	2.927293829	9.448773475	0.703949244	25.20526654	2.331635151	0.611161018	2.322862159	3.913689289	0.30398476	0.095113819	5.768767216	0.06434878	5.897154784	0.511554794
KO-COR-131	IL15RA(-/-)	8.688955674	26.0116814	3.806749887	1.489119792	16.63059996	2.233828287	2.591823254	23.7533533	0.482188485	2.116388485	0.240970176	57.99792228	1.176863684	0.687107954	150.7003794	48.54053434	30.42321187	1.782958448	12.12257946	20.5807221	0.687844694	0.293034705	0.802576109	8.570816303	1.860814659	0.863481995	32.42567722	59.27234898	0.970127732	5.924477512	5.763635321	1.323704841	3.420685062	0.571920555	1.935672085	7.85367126	0.38060686	28.84544671	2.596079197	1.98986394	3.000879301	3.051410517	0.307612945	0.100007338	7.495564087	0.044310143	6.955495697	2.345498551
KO-COR-132	IL15RA(-/-)	10.46431119	22.26355187	2.36302146	1.105527761	14.99267321	1.242419919	1.770336717	17.22467358	0.528323708	2.241735852	0.482473159	64.76544456	2.406899241	0.676046612	154.9120251	46.79068661	47.61294979	1.55010434	11.51196852	23.26077591	0.78662455	0.256127861	0.598880341	8.623890282	1.510256742	0.486858672	30.69667898	41.35689338	1.292044632	5.831946321	5.420688877	2.49115386	2.954347876	0.518183724	2.153038292	7.491863251	0.831584418	30.91834899	2.423740228	0.429379738	2.858998167	3.705444475	0.357524755	0.103949406	7.504802393	0.092191488	6.802658581	1.456922027
KO-COR-133	IL15RA(-/-)	10.45901709	24.50287263	3.57167977	1.256898141	16.37286803	2.023902083	2.547018361	16.08648298	0.775144065	2.124975321	0.26956852	69.1864758	1.668243556	0.601047392	180.1820917	52.59500913	32.83437127	1.501913967	11.04961057	20.15665723	0.999831168	0.304755872	0.799095971	9.022538931	0.698021399	0.761924575	33.18033476	53.8171617	1.131942828	6.126529475	6.12271618	2.382267737	3.61180566	0.385659974	2.380517821	6.766673854	0.714593376	57.52635571	2.826352014	1.069256276	2.471082156	2.736075812	0.387652395	0.110938935	7.60889863	0.078277657	8.470014895	1.837720279
KO-COR-135	IL15RA(-/-)	8.114120644	27.85796435	2.791887811	0.880535089	15.25436575	2.495452207	2.662916989	45.10446658	0.434497561	1.615929697	0.361186296	60.16095377	0.899513799	0.711160299	145.4515778	43.82486385	33.85767284	1.703803096	10.83558265	16.40213551	0.945605096	0.313013578	0.843385587	8.662933865	1.53895821	0.523174163	31.69821001	59.83188959	0.482082287	5.447538957	5.960082571	1.781875139	2.773055772	0.951697799	2.48791278	6.734001492	0.559993018	30.05633177	2.688043276	0.677648642	2.487749326	3.113439328	0.283841627	0.072737531	6.651814478	0.031265136	8.825503506	1.498634387
KO-COR-161	IL15RA(-/-)	7.994491959	32.09879492	3.011518256	0.949366025	14.6672501	2.971232624	2.412922091	59.63045244	0.385129078	1.344814957	0.366405004	47.87807348	0.900548234	0.645250845	125.221654	37.23348377	25.12265475	1.799717014	11.07420035	18.26150197	0.69186168	0.279385968	0.674131128	9.518473001	0.425691978	0.436047517	29.12371443	46.99279233	0.482676429	5.640860453	4.329323728	1.755710426	2.696753277	1.18700414	2.261817752	8.594735621	0.289855337	33.11727847	2.660799688	0.545583721	2.441176056	3.300722424	0.277527352	0.141518497	6.509480773	0.038022276	8.71058771	1.028484349
KO-COR-164	IL15RA(-/-)	10.42840744	27.85224833	3.025090621	1.014134805	14.36642033	2.314085715	2.414523506	40.28548722	0.302537464	1.199102355	0.377692493	47.13332624	0.892653445	0.626246868	122.2752529	36.44181273	45.79222347	1.762546584	13.70171437	20.90806374	1.198312459	0.281714059	0.878327204	10.08620313	1.307733445	0.39860393	31.76749142	39.62260445	1.202164725	6.445436952	4.904534294	2.105185899	2.530416498	0.938533908	2.38856785	9.824634777	1.233099711	16.24161837	2.774413455	0.128443843	2.524563679	2.690567857	0.293257255	0.233709721	7.510519532	0.075806948	9.872579664	0.95836057
KO-COR-167	IL15RA(-/-)	9.271095237	26.85714727	2.932749997	1.033791856	15.59859042	2.428819149	2.307349716	38.82222581	0.25583893	1.537213847	0.32389717	61.84615575	0.814491196	0.674642845	158.6598502	46.59818945	29.34521879	1.698613054	13.57920208	21.91864126	0.860585585	0.336345575	0.731510151	8.202475325	0.532908077	0.47299139	29.97248723	53.2876713	1.235344181	5.317354144	5.853510084	1.571678775	3.124809539	0.906462527	3.003691903	8.97427492	0.602357741	35.86715083	3.150917637	0.626652016	2.369468469	2.508750495	0.323118768	0.189046371	8.096001228	0.066299464	9.096008113	1.273246305
KO-COR-183	IL15RA(-/-)	10.39094436	26.4435959	3.183925767	1.177298276	15.85392204	2.738386672	2.44364458	43.42482518	0.358968475	1.286157181	0.314297826	50.03257844	0.856197315	0.683452147	130.2914332	40.18996003	38.25247378	1.625059025	12.83372306	18.79479178	1.072788154	0.165324755	0.755731788	11.0335679	0.257139583	0.441432593	32.72096261	41.95412616	2.446577838	6.615743688	5.565614084	1.47591544	2.673519034	0.909259082	2.427115028	10.25488373	0.957176707	22.6133561	2.78927954	0.446487786	3.52960878	2.136563969	0.374776132	0.14783924	7.175443828	0.08838441	11.30255738	1.074954976
KO-COR-186	IL15RA(-/-)	8.8293566	27.00765065	2.854979163	0.844176489	16.61312175	2.535937495	2.469660616	40.68875199	0.410558601	1.317361888	0.331096281	52.76917195	1.04738177	0.54596393	127.6925784	39.67666403	40.1126611	1.625577417	14.53919945	15.93269314	0.707686264	0.28271868	0.760889524	8.987972184	1.372902334	0.445851172	32.87266232	52.14173258	1.090835693	5.794313003	5.50875982	1.586837703	2.595016422	0.895290709	2.655961456	7.609333152	0.709730738	27.55522224	2.980111531	0.61887887	2.928185772	2.06097896	0.382187932	0.10313098	7.291319073	0.112375057	15.14892156	1.31163145
WT-COR-104	Wildtype	9.103599761	26.16076851	4.294814139	1.280191707	12.39554188	3.019642099	7.394534131	33.46255884	0.391459093	3.108334936	0.174650645	64.6951539	8.27685719	0.801981287	170.1092931	53.79711516	27.32700518	2.083619725	9.87440684	24.32833295	1.759407147	0.497994341	0.772712082	11.31868138	0.884865638	0.797365837	33.92417223	50.54935911	1.205064479	5.947495782	5.563671697	2.456099148	3.91549387	0.744503096	2.786898265	7.33252242	0.621192847	44.93438739	3.083543742	0.697648842	2.520517316	2.985573331	0.256099312	0.166612047	8.504977679	0.115028234	9.067354496	1.997521046
WT-COR-105	Wildtype	8.484065095	27.55467695	4.587052863	1.501447804	12.66928352	2.801002174	5.915389534	34.45388963	0.366023112	2.775205246	0.2283868	58.78169572	5.455092153	1.048863219	146.1173101	47.73563706	37.06218579	2.339064624	11.02877681	19.28679471	1.964657125	0.460551049	0.971035139	9.692271223	1.575037278	1.257506277	34.83608306	54.79173135	3.741511826	5.209001867	5.577203421	2.431503785	2.944304519	0.748965851	2.555263636	7.174624976	0.843127901	15.01158436	2.505234942	0.188246582	2.732904574	3.070967509	0.203335701	0.174900246	7.104216972	0.065598681	8.820763817	1.339413546
WT-COR-106	Wildtype	6.939940312	18.49423913	3.395644865	1.007037831	10.06636041	2.829016	6.067597634	36.1175145	0.278521218	2.317120888	0.127184306	37.73142634	7.849080264	0.539977565	97.94752506	29.6187114	20.12960943	1.592784027	7.648525465	15.19040406	0.986255608	0.242204017	0.510807203	7.914310213	1.777092396	0.874257433	26.66741835	47.71513691	0.843550179	5.289157075	4.459968705	1.915837632	2.233985702	0.759433922	1.482452075	4.946650932	0.333085415	9.642854564	2.317661714	0.084574202	1.5190462	2.102635225	0.235624098	0.099670514	5.611975762	0.080503965	6.839750193	1.269522583
WT-COR-127	Wildtype	8.018314967	23.86992134	3.943945143	1.512168002	13.48306055	2.929786494	4.732762255	34.61190478	0.574907784	2.69539826	0.247810407	59.24483675	7.930039542	0.697556872	155.853261	46.97752619	43.23937494	1.968241895	8.646960492	17.32181072	1.238804335	0.351930513	0.807990695	9.104252554	0.654543095	1.642965745	34.01111019	55.0668054	0.958195902	5.294766484	5.601611054	2.887701791	3.045531399	0.773543668	2.167865056	5.089414357	0.539057941	31.01669097	2.393209951	0.591828767	2.019253214	3.24788251	0.283099405	0.167719041	6.769428819	0.06113636	7.014076888	2.116567157
WT-COR-163	Wildtype	7.506797145	19.67007082	2.927423334	1.001169311	8.474479927	1.863353152	3.490714658	32.36405143	0.293046453	1.663594657	0.197932602	39.94918701	6.003391735	0.530764015	105.5362798	31.82978308	37.14407835	1.661245607	5.952165348	14.98656696	0.823531011	0.336876653	0.66115837	7.801083257	0.376434934	0.82806237	24.86987017	33.74199997	1.124200815	2.52368913	4.953551506	1.214078948	2.230419295	0.660417573	1.940514833	4.900945633	0.824761433	43.52756572	2.039233156	0.767446101	1.574676863	2.537592831	0.21412726	0.123198925	5.728890592	0.084635358	7.42250093	1.257554564
WT-COR-168	Wildtype	7.390470078	18.89216236	2.857391387	0.861280618	8.639598497	1.775809112	3.576934854	27.96837921	0.274865244	1.862343513	0.183522217	42.44470581	4.971061722	0.531964622	111.2247974	35.24665512	35.19763837	1.503302914	7.002648066	16.34506617	0.876239519	0.23557562	0.776979902	7.115587156	1.336333163	0.724478402	26.70137651	37.94062322	0.88628057	3.278742555	4.341282668	1.11628809	2.343405582	0.574722195	1.72119071	4.615807914	0.893644441	14.04888358	2.198378065	0.251650766	1.772849925	2.089975266	0.262823698	0.106344417	5.663054708	0.088503194	9.608598431	1.621285486
WT-COR-171	Wildtype	8.829979507	27.10956373	4.173700155	1.123181403	19.45262895	3.236636879	5.229870299	45.76089051	0.347902451	3.014223757	0.296035865	55.48114984	1.910240334	0.771612956	137.5137189	44.58047757	40.83221921	2.286791933	20.64881677	19.66312033	1.568627536	0.368808361	0.975122438	9.899484275	1.606150634	0.714586156	33.56087067	44.90596912	2.164774015	6.754345823	4.764664344	1.551046567	2.972114728	1.005683656	2.95515205	8.690499501	1.24103646	13.11409828	2.83541137	0.382506035	2.359961655	3.834991072	0.288407545	0.208680995	7.602792751	0.127427813	10.14518883	1.867012986
WT-COR-173	Wildtype	7.948340424	20.88835326	3.22658059	1.742533464	10.04076728	3.382355595	6.434622376	41.74061737	0.310503318	2.703888074	0.170819036	56.38626271	11.03561721	0.58860035	168.8891944	50.16424072	30.6800287	1.88056873	7.205738468	24.53411515	0.890060104	0.406355481	0.573701329	7.168081688	0.905881885	0.983141975	30.35072613	48.04275736	0.309126927	5.569580854	5.973758739	1.743574309	3.64673997	0.769404641	1.921209546	5.595703402	0.652076231	52.58158258	2.687241051	1.03182778	2.327048062	2.70923296	0.27534186	0.105513903	7.643730938	0.023956342	4.635840888	1.950414405
WT-COR-175	Wildtype	6.580731042	20.21974531	3.17269356	1.122864177	9.779065019	2.653153297	5.240767381	31.76412027	0.216491505	1.900800627	0.187369213	45.30282527	4.680700948	0.528013102	112.3297265	34.79506488	27.00619147	1.813977646	8.336223717	16.95881017	0.900021036	0.399018413	0.512741623	7.689780352	1.232241769	0.686127746	22.46697658	33.92693571	0.830732417	3.729850344	3.719552431	1.497449304	2.465438395	0.684337418	1.886721549	5.622010178	0.588347671	41.19316205	2.183359559	0.625107245	1.891852208	2.643078506	0.201107449	0.087921157	5.196581941	0.050788015	5.110907604	1.280834104
WT-COR-185	Wildtype	9.397039719	25.38729384	4.276807724	1.437471113	11.96290438	2.575013468	5.500876715	29.06174041	0.836275494	2.633326397	0.231166995	61.68048983	18.91518336	0.709965145	156.7286079	47.42294508	46.42696392	2.280893635	9.130799262	23.16799481	1.096631258	0.294562113	0.686966198	9.655808474	1.659231249	0.974484475	33.83714831	50.4338979	0.36674603	4.867050188	5.867604817	1.577369174	3.313502029	0.594409459	2.248395766	6.52361861	1.044319591	45.79844113	2.715490348	0.819256541	2.609158228	2.456599043	0.266781058	0.097777801	7.24127363	0.096122741	9.855906204	1.624405834
Z-COR-125	IL15RA(+/-)	5.418519321	16.73182302	2.439357399	0.742084729	10.95810963	1.520005519	1.529765148	20.73321833	0.206395533	0.820461213	0.211824754	37.44760561	0.837723363	0.416592157	94.23456593	28.70505917	27.27255475	0.970400736	7.992940776	10.86841267	0.508092885	0.189725387	0.48750364	6.068291337	0.267111836	0.458763019	22.71061587	34.74865514	0.75406652	4.553338217	4.47333472	1.109645153	2.100622665	0.514515469	1.559519807	3.753567777	0.539084652	24.77737351	1.98719947	0.523827031	1.979780411	3.246386422	0.135993355	0.078955655	5.200742879	0.022703691	8.174326229	1.122768098
Z-COR-126	IL15RA(+/-)	5.864199335	21.97847	3.890734159	0.684465231	14.57905947	2.766776069	2.121522641	27.61282392	0.456261525	1.129948603	0.237784853	44.93740143	1.616271411	0.650769067	116.7836272	34.30983327	35.03955348	1.319273025	11.21175241	13.48543698	1.051960346	0.257431281	0.501550806	7.31258137	0.353500898	0.508286645	28.50102903	53.99453745	0.455575689	5.598652789	5.355817517	2.331603772	2.4059241	0.637651288	2.463444046	5.915170614	0.603721068	14.41219805	2.669023924	0.349050896	1.896377473	2.808688372	0.23562599	0.074894318	6.140372449	0.084688014	8.931542562	1.189333371
Z-COR-130	IL15RA(+/-)	4.953088512	16.34154247	2.067486768	0.578074858	9.320442053	1.786540212	1.365981359	22.91291087	0.24201416	0.590268578	0.17907779	32.68690999	0.731427642	0.441748986	88.1514903	26.82840662	19.96183902	1.022902466	5.93340247	9.979190204	0.396767614	0.131282913	0.345643739	4.702971468	0.221186642	0.327533492	18.20399894	32.06595183	0.242520326	3.75656007	3.864422333	1.0122933	2.017756274	0.525971142	1.022331756	5.798837018	0.274359434	18.15953742	1.61932331	0.334046992	1.963131653	1.797644631	0.158069124	0.072920162	4.527214557	0.04070674	6.246080858	0.812129802
Z-COR-134	IL15RA(+/-)	5.331069705	15.90769296	2.095404834	0.683764592	10.23813181	1.601343154	1.190451806	23.97311748	0.22515402	0.673433508	0.208068645	34.62533807	0.712958775	0.44687853	100.741846	28.4585322	19.66009096	0.927332223	6.562334973	11.55222373	0.66074628	0.181584845	0.543062501	6.751925594	0.342427156	0.379716248	21.60731497	42.94010809	0.896626098	4.307572756	4.443120344	1.429444894	2.120899329	0.505474049	1.392057843	4.203417288	0.308894512	20.05224196	1.854016458	0.28540424	2.144247804	2.246596801	0.171449804	0.055999045	5.554304779	0.057457807	6.60252021	0.906111407
Z-COR-165	IL15RA(+/-)	5.573470362	14.47920741	1.966629204	0.567954355	9.285986973	2.141186367	1.063205189	16.00705178	0.215017381	0.516568285	0.210183404	31.25786362	0.644212129	0.331678684	91.86848064	26.35283827	17.70663876	0.567603445	7.311481742	12.09100814	0.511026666	0.145548265	0.382400895	5.354667309	0.332793141	0.414725423	18.66358879	35.17954511	0.407201409	3.586749148	4.04974998	0.821906921	1.94116721	0.394678471	1.510817053	5.148370846	0.366362369	18.18578495	1.651258811	0.119112225	1.572481518	1.769654583	0.255021991	0.113813217	5.237223452	0.043988765	8.147597993	0.816529068
Z-COR-166	IL15RA(+/-)	5.21898349	14.93811666	1.929276283	0.550188311	9.752841612	1.697487195	1.246839185	24.79286974	0.411162399	0.596942161	0.182666847	31.10805365	0.653184974	0.41835636	93.48656952	26.73731912	19.52314735	0.879552136	7.835515181	11.09707814	0.501594597	0.15235147	0.432927027	5.300019509	1.149347735	0.336339915	19.06877673	35.394316	0.331148882	4.131095892	3.462103878	0.87160333	1.978910132	0.54818797	1.156977239	5.474783335	0.285292009	13.55379413	1.710592558	0.232022729	1.530967011	1.288082911	0.164201465	0.100261007	4.945173837	0.047314754	3.77643324	0.864244344
Z-COR-172	IL15RA(+/-)	4.752367005	17.12378286	2.271172209	0.663508677	9.54607332	2.098979804	1.423883431	28.51762075	0.215331484	0.810888812	0.153970047	35.21526602	0.63376602	0.460715898	102.0955508	30.47196843	30.08202935	0.941156034	9.735704782	14.99335951	0.698562275	0.098929747	0.464259976	5.815437663	0.447057261	0.304906457	18.92666818	29.64007741	0.676399414	3.793148195	3.541237073	1.457189611	2.278320869	0.563493935	1.650984969	4.443839696	0.633044476	13.81384433	1.901776146	0.157629536	1.745572084	1.742358657	0.155357674	0.068554913	5.205473281	0.021799487	4.784953682	1.082864043
Z-COR-174	IL15RA(+/-)	4.502347763	15.68322217	2.32968915	0.759584019	9.283343304	2.022540367	1.286907385	24.6390171	0.197344331	0.768797536	0.13118461	33.46777392	0.639222251	0.44774802	101.6929269	29.19293656	20.11929194	0.907476482	7.928680049	14.0497651	0.804628401	0.156024005	0.439680212	5.708815712	1.469252477	0.334961972	19.78947622	33.46578492	0.498867637	3.784722663	3.384049327	1.533798889	2.190357483	0.577942668	1.562518961	4.588370434	0.341118191	27.2030948	1.769822212	0.34381268	1.474756875	2.249990862	0.159607084	0.095405652	5.355139031	0.048488193	4.685835272	0.842393337
Z-COR-180	IL15RA(+/-)	7.022849873	19.99567738	2.622486558	0.547289911	12.38468728	1.64226327	1.712807283	30.22137249	0.245222848	0.805954651	0.298246144	45.33715163	1.01984571	0.579802364	113.2894515	32.11553275	33.08820319	1.178552397	9.406028778	12.55674032	0.775726467	0.210981502	0.756135886	7.011996563	0.397686837	0.503155837	26.81249674	41.74515163	0.889985962	4.89295001	4.776301499	2.129674104	2.222830133	0.612559707	1.859872093	6.111198392	0.863429285	6.437535053	2.231380428	0.112784036	2.154315447	2.417914763	0.264504	0.073165426	6.119174153	0.05467738	7.083171734	1.007256773
Z-COR-181	IL15RA(+/-)	6.510228023	13.71904972	2.298544453	0.678010479	12.16597994	1.22814046	1.330600255	18.83858535	0.286819712	0.75256865	0.212364279	39.78779565	0.957774511	0.462530663	99.72713375	28.15975224	28.86560397	1.002536132	9.822529359	12.65600301	0.721600197	0.226527722	0.592238931	6.93203196	0.373560126	0.321326566	26.69798921	40.43333826	0.417636221	5.154306772	4.783672501	1.204222998	1.993797958	0.437871692	2.072395811	3.900850469	0.732755607	16.19809801	2.004663614	0.293124506	1.731392933	2.680979244	0.255355752	0.064605448	5.61778288	0.05466983	10.80459375	1.205746868
Z-COR-182	IL15RA(+/-)	7.559258527	20.41624715	2.588554196	1.183974529	14.92807294	1.45599738	1.626644817	24.0622511	0.296158044	0.996373705	0.260237607	52.3571272	1.514813722	0.627099102	136.6523079	38.17550967	29.44002121	1.252303866	11.46219561	15.83296635	0.819025855	0.233366334	0.702695016	7.589667423	0.38259097	0.757658466	28.54855437	50.61103419	0.651345521	6.44145176	4.742254306	2.161301419	2.670526091	0.505470921	2.364103301	5.145913274	0.560087426	22.40855262	2.487694206	0.43036023	2.269052147	5.408066497	0.278042865	0.146124673	6.840575734	0.071961307	12.83643931	1.248990782
Z-COR-184	IL15RA(+/-)	5.945031604	15.56157584	1.89453971	0.908909255	10.33363546	1.356271598	1.290242556	18.71220382	0.493896861	0.614432411	0.223768909	36.74288543	0.513292098	0.365518287	101.9884552	29.66815569	18.84607281	0.935942668	8.383641957	14.35375347	0.464285272	0.120701439	0.43159634	5.941582239	0.352309568	0.08453049	21.43757525	42.31530038	0.329834165	4.549254713	3.961190408	1.1541516	2.248856003	0.436546614	1.59637476	6.76117293	0.384094613	12.90045752	2.285716873	0.194020623	1.968117443	1.172465847	0.28328241	0.087555736	3.203416848	0.051076862	9.375789523	1.893735838
QC-1	QC	7.195979842	23.20478122	2.972816515	1.508767085	16.44106759	1.245442295	27.88552861	17.10959653	0.509903497	3.273254091	0.44756965	69.15094601	4.937226585	0.510341731	163.8180531	52.70115988	44.28662143	1.368834852	12.7689854	27.94329903	1.382586548	0.433731907	0.825776868	9.633632112	0.606936388	0.872713184	33.76206861	51.37073715	4.294771269	5.923564289	5.715554773	2.596578004	3.395600758	0.344607489	2.398758258	7.158767536	0.690792523	67.39829854	3.155509411	1.218863757	2.761394501	3.613111376	0.338390347	0.140523792	7.160067457	0.114764115	10.70622661	1.749080849
QC-2	QC	6.957931516	22.34144099	2.683095147	1.554509828	18.82593845	1.10317482	37.44789982	16.37480142	0.507225248	3.643209337	0.462052874	71.16018083	2.348810182	0.445138273	164.3866553	52.38659668	43.55723962	1.213794725	15.36929067	29.06949453	1.329257481	0.397735362	0.787786949	9.525203541	0.532967868	0.800444737	32.73822315	51.37764398	4.468848541	5.995928777	5.80049783	2.56393064	3.398214001	0.298864219	2.370241875	7.644129915	0.692310005	63.27614182	3.240610323	1.424430696	2.681568609	3.548348306	0.343966366	0.14793112	6.878863333	0.15464704	10.17190119	1.676093076
QC-3	QC	7.081247993	23.08465738	2.694536557	1.490744321	19.28604123	1.093365947	34.82197169	16.69370525	0.527392688	3.643196735	0.507145253	71.77348876	2.06720993	0.486759419	167.7339093	53.4530332	44.99332763	1.360942987	15.393584	28.40840339	1.538137541	0.436984334	0.785328263	9.619748974	0.565673078	0.23802115	33.38246781	52.47876317	4.48111436	6.283247932	5.872519527	2.672718763	3.366421273	0.35571623	2.411112039	7.286249592	0.653047681	64.31891031	3.189743932	1.535036158	2.835811393	3.787134373	0.380619227	0.115592046	7.095884313	0.148698391	10.73300051	2.194327622
QC-4	QC	7.131006856	22.49658624	2.729900981	1.480255479	19.08032834	1.064157575	31.69984136	16.63973784	0.531770523	3.724837881	0.512467693	71.97925502	2.125948106	0.525128795	166.5292453	52.40102025	44.55828914	1.322825738	15.41427546	27.6074282	1.294264206	0.436161203	0.752608605	9.711639216	0.701446231	0.76654211	33.98109714	51.70797804	4.136281099	6.591453669	5.775849328	2.665889363	3.458903817	0.359844647	2.384384283	6.462516438	0.690853147	62.48108954	3.13030194	0.273607539	2.879877746	3.749122077	0.315151861	0.136077532	6.906690389	0.153516609	10.336667	0.516777811
QC-5	QC	7.150834924	23.57884895	3.171322286	1.733616334	13.76077329	1.477688008	23.36201057	17.54356043	0.510326552	2.886740505	0.403285612	66.22363851	7.463190311	0.512669785	160.5515846	52.44072673	44.23029253	1.375530079	10.03787179	27.75115036	1.209652994	0.470638073	0.830282148	9.479769947	0.62763301	1.099308192	33.65278494	51.02929603	4.347752409	5.466261556	5.566373781	2.595656225	3.49691367	0.329157713	2.387781537	7.999529816	0.789790155	71.74566746	3.134569328	1.451120683	2.93279929	3.576871969	0.329412379	0.184677827	6.999781308	0.054025619	10.91111428	1.563303857
QC-6	QC	7.372894222	23.39762791	3.339441918	1.448728858	13.81261226	1.320110721	20.46337054	17.73631302	0.489787683	2.84107348	0.378866029	67.57978389	7.606279551	0.548382489	163.3843035	53.22734249	44.41102558	1.442155292	10.2016436	27.42672698	1.432580823	0.402867541	0.882454221	9.709052498	0.654661651	1.13763021	34.48620279	51.02841396	4.115889224	5.43701438	5.694652634	2.504677991	3.298719031	0.36961889	2.499096897	6.797842642	0.671011854	71.79249816	3.126388191	1.310083885	2.728330285	3.533282877	0.320091384	0.127990531	8.093050024	0.074966648	11.02730246	2.284936185
QC-7	QC	7.481963543	24.32952585	3.218602198	1.344747688	13.88071198	1.414156697	19.51807769	17.66946121	0.49291829	2.900466608	0.421600439	66.18932904	8.011921432	0.543971626	160.3226204	52.29823997	43.96955407	1.49776029	10.19724686	27.39659071	1.491626244	0.45800493	0.916201022	9.756378495	0.559236489	1.194332703	34.33163585	50.60232774	4.218741981	5.767479419	5.583435541	2.576595043	3.354432754	0.354443233	2.339932916	6.762336813	0.647742294	70.77548392	3.111442753	1.318903581	2.509979683	3.483908653	0.341100869	0.130873696	6.986135375	0.102730384	11.05737424	2.25904654
[truncated: 200 more columns]
