# Supplementary material for: Metabolic responses in the cortex and hippocampus induced by Il-15rα mutation
Source: Royal Society of Chemistry journal article supplement (doi:10.1039/d2mo00105e), 2022-08-02
Supplement: d2mo00105e3.csv [file d2mo00105e3.csv]

Peak	Group	2-Amino-3-methyl-1-butanol	3-Aminoisobutyric acid	2-hydroxypyridine	2-aminoethanethiol	22-Ketocholesterol	glycolic acid	hydroxylamine	Aminooxyacetic acid	N-Acetylisatin	O-Succinylhomoserine	Acetylsalicylic Acid	Gallic acid	Methyl Phosphate	valine	N-Oleoyldopamine	benzoic acid	leucine	Isoleucine	glycine	2,3-Dihydroxypyridine	acetanilide	Pipecolinic acid	D-erythronolactone	threonine	Diglycerol	Erythrose	Aminomalonic acid	beta-hydroxypyruvate	nicotinamide	L-cysteine	creatine	succinic acid	D-alanyl-D-alanine	xylose	3-Hydroxyanthranilic acid	alpha-Aminoadipic acid	D-Arabitol	erythrose 4-phosphate	D-(glycerol 1-phosphate)	citric acid	Leucrose	Galactinol	fructose	Tagatose	mannitol	Myristic Acid	pantothenic acid	4-hydroxycinnamic acid
KO-HIP-128	IL15RA(-/-)	1.285617565	7.661299208	25.83890218	13.30038043	0.983691022	18.65570248	0.627852212	24.49465942	0.137063234	2.977408012	0.443673448	0.06792526	42.26069651	52.18868882	1.756837872	0.612513404	133.6137514	36.98377493	600.7920743	2.126379927	1.950379914	0.571952428	0.383475876	37.18630188	1.57481959	1.001626996	10.40174996	0.196282187	30.90761252	5.418813396	491.3616813	4.067353211	3.54286752	0.37147572	0.111098593	0.414374433	1.605807741	0.771618338	1.025672911	2.954864674	1.172904278	0.735756359	2.770110085	0.122785203	5.113158453	3.085535698	0.621567666	0.232884774
KO-HIP-129	IL15RA(-/-)	0.553115246	7.635508877	24.08207655	13.50190124	1.127996932	18.2846663	0.562230458	22.0073804	0.15289597	2.871022999	0.384418211	0.07299096	35.26980214	51.05031249	2.637597881	0.577556097	124.8153947	35.37011101	559.9115048	1.871778847	1.497076512	0.648201607	0.361026296	35.07165446	0.741680601	0.973634894	10.00275448	0.76667983	30.80208957	5.723752577	573.9065329	4.330642442	3.604182449	0.259808155	0.108261466	0.526358917	1.653824094	0.672689566	1.10785145	2.978182468	1.462921579	0.575696848	2.093539008	0.095750899	3.474709361	2.624824312	0.687101841	0.166048557
KO-HIP-131	IL15RA(-/-)	0.853221921	9.482728892	24.23933288	15.93211128	1.339806668	16.38851431	0.546563485	30.30850356	0.187187074	2.404543446	0.341146732	0.080297331	27.11705035	48.15161973	1.3736615	0.879771284	116.1744288	35.52281601	540.2545954	1.986997764	1.255758055	0.461056343	0.338145789	34.78722203	0.962854587	1.212336049	9.830856575	0.75445112	26.33697045	5.176793932	650.8540119	3.780464868	2.137141774	0.370780877	0.145311603	0.566874167	1.491020844	0.373148987	0.703803061	2.327017259	1.196148462	0.634300055	2.329188053	0.113112617	2.329107689	2.005322019	0.763543346	0.151627838
KO-HIP-132	IL15RA(-/-)	1.318084058	5.143977366	23.3638496	11.29993357	1.27217998	17.0565262	0.737255388	26.83165774	0.232272491	2.645384814	0.370711303	0.068729832	26.63847323	60.926483	2.03209139	0.559438352	151.0435111	45.0755957	670.2673087	1.742672818	1.433680413	0.862673891	0.316795094	41.9138827	1.706276319	1.090802755	11.6733464	0.807681118	30.90807274	5.043558	725.1796906	3.986270675	3.944798559	0.381685083	0.130455379	0.595328393	1.907755537	0.549491394	0.663381533	2.440978922	1.1490546	0.718842023	3.64455315	0.110767666	3.879428299	2.296819343	0.683988358	0.178189933
KO-HIP-133	IL15RA(-/-)	0.944604309	5.029112394	24.14008209	12.89185191	1.162247913	17.30984432	0.608264041	27.90398437	0.276018739	2.121630397	0.357178321	0.063896227	26.25310003	52.93302619	1.631899796	0.57212093	139.152547	41.8548629	576.3464522	1.655075993	1.190995951	0.917186731	0.341635177	35.32187075	1.030323101	1.175645606	10.37536993	0.719867312	28.65061291	5.724156346	798.2763548	3.861583764	3.031121805	0.265363689	0.13318242	0.530217306	1.956058224	0.387717596	0.586266716	3.389429771	1.678071016	0.639193756	2.830928908	0.115784341	2.791479144	1.821467415	0.535828363	0.191527175
KO-HIP-135	IL15RA(-/-)	1.366879655	6.665990283	26.3452536	13.78854778	1.157759616	16.8062203	0.71194516	28.78500043	0.176541846	2.179633272	0.395760693	0.063114461	29.92355719	52.75170858	1.994536859	0.533001404	127.8536902	38.03377243	509.2077606	1.801054426	1.146676419	0.960292352	0.367785408	32.44374366	0.920123077	1.180613937	9.7994093	0.910922869	28.50656473	5.021443095	760.6009966	3.950509899	2.937330746	0.433717829	0.128408778	0.448066847	1.650448223	0.546686129	0.890558166	2.935476047	2.023658375	0.63069872	2.832396979	0.119973464	2.633333703	1.985616132	0.607822896	0.197990858
KO-HIP-161	IL15RA(-/-)	0.839542565	3.921087484	26.66775737	13.55926433	1.102604465	14.741771	0.628691621	29.74270135	0.237667582	1.771149128	0.38496627	0.056107093	24.91344305	48.07343496	1.829475773	0.597817806	116.348811	35.08231986	547.6970291	1.786739955	1.368784071	0.744032224	0.270908717	30.82774215	1.033339723	1.210410408	9.874536706	0.570718562	27.46767891	4.812878844	976.4703913	2.843632866	3.375284358	0.24958213	0.150762564	0.373706615	1.572435773	0.46935192	0.422938782	2.382505708	1.661985005	0.669975807	1.882701934	0.100895992	3.081022358	1.63233065	0.661605654	0.19563778
KO-HIP-164	IL15RA(-/-)	0.717904086	6.236507235	28.4778487	14.19066868	1.024773451	16.08340794	0.694115134	31.21902096	0.194187943	1.634579569	0.303927742	0.062858946	25.87326539	40.96770306	1.896449809	0.558519929	102.2161	30.80000226	519.4413516	1.89016978	1.187281248	0.734221665	0.367464773	24.66434384	1.134896772	1.237307186	10.01092548	0.702150701	28.27353413	4.284590959	943.0320147	3.488074665	3.145845978	0.194362757	0.153535924	0.321981327	1.556159107	0.547429321	0.648546721	2.69003739	1.710651389	0.478831093	2.392395688	0.117670684	2.133143095	1.922201831	0.640525424	0.207460608
KO-HIP-167	IL15RA(-/-)	1.142644334	6.299489535	27.06106126	13.26805126	1.045660877	15.77112925	0.559102706	29.12627601	0.217617745	1.625241498	0.322968508	0.077595472	20.21589551	45.32964105	1.038291649	0.565524413	105.4692166	34.38919911	576.5701729	1.705006138	0.976062098	0.76601986	0.302679774	26.87671171	1.180433564	1.138335495	9.53478915	0.748455347	26.26495617	4.639945772	869.6105188	3.231768866	2.100541699	0.214378734	0.15389045	0.385306124	1.575251842	0.254852762	0.524260175	2.628510728	1.297299914	0.443343929	1.84265298	0.10219169	2.443104721	1.752188102	0.536959545	0.214514294
KO-HIP-183	IL15RA(-/-)	0.473552014	6.646164961	24.98666846	13.38329975	1.254122247	15.05819907	0.577735802	25.92012234	0.169812202	1.735719618	0.334975161	0.0828019	23.9007933	49.30152512	1.219185727	0.538098651	130.8031995	39.93521966	602.2876786	1.732038397	1.086502081	0.578726173	0.276121898	32.58293893	0.92082261	1.085168789	10.149256	0.796987023	27.25053027	5.305399131	779.1969722	3.433223123	2.482772701	0.348230855	0.11710306	0.344955843	1.393111047	0.280837649	0.61706863	2.8973424	0.972182755	0.630962963	2.823441762	0.131108045	1.803631151	1.793759878	0.764721242	0.213010892
KO-HIP-186	IL15RA(-/-)	0.949516575	6.472186624	25.52028327	13.51160102	1.147084317	16.61559812	0.625375601	27.63393066	0.198126482	2.196631275	0.363972639	0.069631748	28.23660767	50.1674143	1.741002825	0.599436227	124.749065	37.30476739	570.2775928	1.829791404	1.309319676	0.724436327	0.33260388	33.16764121	1.120556994	1.130588212	10.1652994	0.697419607	28.53686224	5.115133205	756.8489165	3.697352438	3.030188759	0.308938583	0.133201024	0.450716997	1.636187243	0.485382366	0.719034815	2.762434537	1.432487737	0.615760155	2.544190855	0.11300406	2.968211797	2.092006538	0.650366433	0.194889271
WT-HIP-104	Wildtype	1.613165956	15.76083839	25.70639298	15.37031224	1.255196676	16.81793922	0.610769319	43.84191326	0.298139032	3.254345644	0.317614987	0.105959124	31.97736437	57.89506775	1.886185961	0.617802243	155.7417722	49.3292351	553.9602487	1.488908768	1.308325351	2.335198663	0.333552984	39.11597006	0.877444508	1.682636798	11.99110346	0.597850518	26.31785197	5.295108248	902.8685948	2.925093104	3.493725676	0.446115977	0.20871754	0.52245297	1.722319624	0.619115525	0.770408148	2.747621484	1.82193745	0.709014923	2.217137888	0.127516805	2.404815159	2.617643506	0.679568185	0.25431694
WT-HIP-105	Wildtype	2.357960796	14.64726619	26.54860661	16.67895377	1.614025654	19.15729574	0.640903796	53.04207008	0.319344389	3.81719046	0.385387419	0.122353503	32.6373707	65.26997398	2.932423021	0.625780082	161.5667329	51.09351272	527.1980531	1.609054006	1.274479542	1.976531363	0.369359819	41.13634643	0.97182431	2.058005573	14.73086231	0.86662405	28.13224847	6.110866037	928.765861	3.617738179	3.62556235	0.690085466	0.308892129	0.585376179	1.671027921	0.467664569	0.927397647	2.612810266	1.78324993	0.827362727	3.081158004	0.122295403	2.886165652	3.449398507	0.743201871	0.224055928
WT-HIP-106	Wildtype	1.591471306	16.86241951	29.0606818	18.02650367	1.382497159	24.11513425	0.62441529	44.27312458	0.331367658	4.279172462	0.358339026	0.094863125	38.24842578	64.59277832	3.597655794	0.722271589	163.8799313	52.15861	588.3153392	1.937636339	1.507662726	2.189099539	0.489431527	39.63663759	1.155600998	1.830870952	13.5563383	0.828609869	32.99934306	7.344063227	1004.038801	4.07480167	3.53913912	0.496016296	0.212831284	0.587502446	1.625740464	0.335169111	1.150073648	3.508516708	2.544609261	0.778115455	1.92130202	0.108255777	2.725152166	3.797909342	0.902814597	0.221630776
WT-HIP-127	Wildtype	1.104843489	9.599365398	24.2622844	13.51185076	1.220523292	20.18160289	0.63007794	33.48691625	0.289913819	3.059676325	0.361968374	0.118671423	35.35200557	55.33921839	2.516196921	0.568231434	138.8037397	43.75893522	470.0807407	1.586446776	1.537492495	0.876041053	0.485821934	33.8176079	1.475538474	1.346801057	10.2852094	0.677298287	30.12219391	5.978637349	763.3604618	4.07164832	3.057242842	0.438643488	0.156769601	0.974843433	1.785087636	0.476771429	1.365268733	3.022448353	1.371186534	0.838376099	1.633030566	0.056029677	4.700024609	2.76789616	0.573560845	0.167812397
WT-HIP-163	Wildtype	1.850337068	13.87057469	27.01423333	17.0607232	0.935377673	19.67815322	0.608779374	40.6218898	0.311635682	2.564736821	0.307970419	0.070890084	35.956012	47.91822609	2.371956334	0.619671657	116.5308058	38.85970017	518.6211474	1.865115734	1.369798702	1.034836859	0.436063912	27.40775428	1.933587504	1.560344777	13.04492811	0.543382681	30.09789414	4.845727377	1114.773112	4.421742157	2.158001932	0.371030711	0.181343015	1.092894512	3.969582506	0.712552553	0.990959651	3.095499119	2.017673813	0.511512397	1.200055112	0.073390564	3.330143666	3.489875668	0.784631731	0.103295461
WT-HIP-168	Wildtype	1.402159239	13.67152304	27.87465559	15.186688	1.417141743	12.30623472	0.551591137	37.78968591	0.251072934	2.778497551	0.361407	0.146231402	40.20797617	56.23503758	4.435277407	0.592529535	140.5930559	45.27513795	559.0833275	1.907301557	1.292122999	0.752132685	0.338157179	39.01170377	1.688865559	1.544462603	11.40348816	1.26633031	31.10522288	3.80259974	862.2223966	3.79467805	2.673651488	0.563673257	0.162606525	0.569883593	0.991433994	0.67160512	0.9901375	3.16172885	2.380575218	0.871531765	3.031933533	0.111971416	2.270898589	3.127334002	0.953737645	0.210114645
WT-HIP-171	Wildtype	1.5815042	13.23182548	28.22102828	16.52272491	1.237639014	13.81674232	0.682382427	39.18050923	0.227192111	2.639243795	0.401865401	0.113468408	36.71806935	66.75544687	7.558341156	0.706461029	172.6100377	54.68419926	722.1956935	2.150811245	1.172943871	1.189226468	0.368617098	45.59084039	2.291240184	1.701627769	12.88896689	0.994888827	34.24280213	6.448287757	1011.361055	3.749575471	2.719078998	0.3014429	0.171573367	0.531379255	2.550133498	0.566229631	0.912138139	3.402219707	2.079980446	0.864679076	0.77690179	0.087322254	3.320689841	3.870564026	1.022500097	0.194830054
WT-HIP-173	Wildtype	1.014372847	13.34786937	21.16316204	12.34794847	1.005146392	13.35802068	0.381672334	27.16942253	0.142568172	2.566490247	0.261323085	0.079088112	17.58887891	48.15670593	2.704275325	0.466394661	147.876724	45.08906837	622.6128403	1.614199437	1.075950673	0.667365438	0.210583266	36.88427325	1.053074031	1.144636134	11.34610951	0.364465412	25.02190211	5.701835712	747.7709856	4.407086077	1.434998945	0.291000207	0.121026134	0.465687254	2.577635067	0.244192241	0.631231431	2.424219652	1.188927804	0.697298576	0.67669669	0.049955554	1.983533379	2.321036154	0.582121173	0.158504189
WT-HIP-175	Wildtype	1.608113531	12.01409984	26.63934026	15.60905096	1.026823837	17.62954945	0.534978262	35.78165197	0.277260284	1.956581172	0.309330169	0.127740329	19.03188698	43.87593182	1.935540378	0.623979331	97.67520083	33.94754832	534.5709448	2.046944662	1.182314043	0.808091529	0.361314516	28.97087187	1.141967368	1.378883838	10.6789055	0.729033902	27.2607946	5.85333778	838.0584632	3.058031204	2.447123013	0.363360401	0.157091656	0.49819789	3.658669928	0.224347555	0.765871897	2.438295765	1.327997056	0.767528077	1.476627898	0.05833543	2.84524997	2.581084751	0.616424692	0.167913406
WT-HIP-185	Wildtype	1.572950529	13.80546385	24.61539842	15.19917472	1.153746605	18.23255773	0.558520946	31.59172388	0.137967684	2.530841738	0.256921041	0.068508433	26.6646853	50.9606792	2.837905942	0.565639482	126.5213283	40.80308127	478.0915264	1.898033438	0.937465675	0.637371879	0.343218666	32.6614145	1.349733424	1.365630806	10.48819963	0.4988983	27.78542599	4.912276229	957.9991783	3.397583411	2.233244454	0.42346226	0.150701759	0.759615585	3.65565245	0.565366331	0.838717731	2.621553394	1.518223104	0.577029888	1.034223152	0.045661117	2.486088084	2.929617662	0.908830167	0.182341184
Z-HIP-125	IL15RA(+/-)	0.968739252	2.42167243	23.84244413	10.78811652	1.200310785	13.76087547	0.665808551	30.83437923	0.218891209	1.288732165	0.295126322	0.066286818	23.17151878	53.69756885	0.626550634	0.533825263	141.8994713	39.22749586	508.1867891	1.274720427	0.855356085	0.632506854	0.278452162	37.75035621	0.853197649	1.196718656	9.554496684	0.539628437	27.08046582	4.570270298	897.289702	4.247348992	2.466313339	0.314921485	0.134638124	0.588822079	2.754515062	0.522955863	0.753810739	2.821775717	1.061248647	0.459252024	1.066328445	0.056501647	2.243227435	1.987769866	0.668999042	0.182766107
Z-HIP-126	IL15RA(+/-)	1.045710713	3.819472228	25.70190496	13.51818667	1.077035563	14.39756176	0.68180918	44.99533837	0.222989466	0.930357434	0.331445204	0.09154037	26.20754873	39.05696745	1.212847244	0.547835815	105.7241134	30.42689754	430.0843815	1.450159843	0.806773385	0.660708896	0.306892903	23.75763959	0.764283129	1.56949424	9.311271136	0.620870909	23.74367483	3.975820575	1022.710592	3.449007928	2.919678268	0.342221296	0.203764077	0.355079835	2.287450975	0.489276783	0.724835504	2.585095257	1.034060192	0.450663489	1.437962922	0.058866935	2.220610947	1.911960546	0.38484669	0.157128461
Z-HIP-130	IL15RA(+/-)	0.915522506	3.283727132	24.99348076	11.33760499	1.096444533	14.31593382	0.763616638	32.6936779	0.159987167	1.151620469	0.334779997	0.054664589	23.78004006	48.23286462	0.629528011	0.507578451	116.970573	34.40856143	495.8593078	1.402059883	0.804315792	0.641592627	0.272355137	31.05894609	0.702361187	1.216163722	9.050737231	0.571248356	26.77593469	4.387471229	905.0309373	3.871272517	2.197493304	0.344432434	0.134715469	0.555000151	2.522109832	0.490099429	0.687993393	2.890267109	0.480998239	0.470037589	1.449062249	0.108007435	2.161938009	2.120399071	0.752877053	0.180098318
Z-HIP-134	IL15RA(+/-)	0.876785529	2.152404024	23.49732779	10.81393417	0.754300864	13.96323417	0.735163836	34.85033074	0.176896722	1.03582065	0.2987346	0.061109342	23.26431762	48.3209418	1.344174738	0.472359874	128.6042236	35.12687784	550.6736582	1.298679997	0.605178169	0.832229689	0.246168884	30.47414088	0.845319253	1.290807472	9.901300123	0.589270516	24.04075302	4.787699123	983.5595912	3.672417756	2.891630189	0.300214399	0.154712513	0.582271141	2.71496543	0.370430876	0.599497823	2.731673551	1.302705047	0.553241366	1.496519691	0.070996515	2.642526352	1.800566622	0.498719839	0.199965718
Z-HIP-165	IL15RA(+/-)	0.776344555	3.329893145	22.93699138	10.92729104	0.907941035	13.07513259	0.665672545	31.19388512	0.179646524	1.060511786	0.280946273	0.065040046	22.88564246	46.037892	0.917971834	0.498978003	121.8879711	34.57797991	536.5268694	1.28837198	0.773586109	0.671935586	0.228329492	30.13738442	0.947632594	1.183407207	9.419744181	0.50638566	25.05722342	4.585095144	901.3164032	3.450532227	2.448624377	0.284112952	0.139013297	0.490990015	2.558373197	0.457400098	0.591684122	2.630320145	1.030182463	0.465000226	1.24672379	0.067341756	2.152669498	1.717737051	0.583873332	0.193536397
Z-HIP-166	IL15RA(+/-)	0.828185045	2.03576884	21.48698438	10.5861304	0.611324848	10.96016792	0.666142122	24.89035052	0.142271475	0.872271215	0.269679044	0.073486063	20.87885969	46.14359778	1.109022056	0.4514173	134.4889126	36.92303285	604.8608537	1.180729026	0.83426823	0.546410561	0.164815106	31.58706663	2.104271035	0.973830809	9.474677552	0.38483342	25.75937146	4.271351662	896.3712842	4.32678455	1.204534803	0.159960905	0.115327719	0.350870103	2.341413553	0.387834811	0.616781294	2.337915145	0.717187202	0.412789975	0.668622322	0.055958116	1.78624356	1.239644247	0.632873462	0.288895349
Z-HIP-172	IL15RA(+/-)	0.214386932	2.891079813	18.93958415	7.830939085	0.650679237	9.550887031	0.623563636	23.15180685	0.181178212	0.867402049	0.227843726	0.053031711	17.61771079	42.44430924	1.05519267	0.355135729	124.8241624	35.0145634	643.880922	1.02489015	0.829167122	0.58357297	0.182741359	32.7946182	0.318258852	0.914958469	9.178589288	0.340197532	22.55532783	4.189451633	640.5417266	3.40162575	1.982287462	0.175933888	0.10071085	0.342777237	2.613195522	0.847918583	0.375173207	2.082454882	0.365931384	0.409298617	0.601868578	0.036644126	2.036014533	1.176431036	0.415896501	0.200696389
Z-HIP-174	IL15RA(+/-)	0.750661212	3.21568208	20.16206771	9.992955966	0.680528723	11.26418006	0.496137592	26.26477769	0.158094953	0.793514445	0.232762021	0.04199128	10.61342515	37.22505751	0.979763419	0.45280221	99.21106745	28.34143392	460.3973959	1.17140922	0.668901458	0.653189163	0.156649799	24.41785943	0.843134723	1.055837884	7.091548476	0.428355925	21.03806168	4.775158722	700.6847105	2.516052161	2.120278208	0.196166633	0.117161283	0.355424432	2.330541961	0.15248593	0.380819581	2.004445496	0.782518502	0.356826758	0.585386907	0.050446738	1.995454624	1.484101593	0.471268318	0.101456261
Z-HIP-180	IL15RA(+/-)	0.355782048	2.535364098	18.73597072	10.89673897	0.819648719	13.11468223	0.649023747	28.61682954	0.170575289	1.098879744	0.231871044	0.066225475	26.17650741	47.49934975	0.756377163	0.511130586	119.5872583	33.87000263	504.073903	1.162489767	0.736580037	0.750055753	0.211697352	30.75615418	0.375465072	1.136177282	10.07260975	0.375172205	25.63289173	4.545469475	1046.265132	3.18841613	2.900951796	0.213515625	0.144862066	0.397948327	3.096867906	0.575084436	0.553494091	2.565577398	1.036273134	0.397111979	0.647730826	0.041789598	2.239234845	1.853573052	0.559882302	0.190824559
Z-HIP-181	IL15RA(+/-)	0.310082555	2.571714632	23.19512636	11.87241243	1.062975956	14.63763971	0.738828128	28.89955514	0.181704617	1.131415003	0.286286514	0.071515616	23.44435293	50.72446593	0.76380009	0.612265038	126.999773	36.14752239	624.1002529	1.384956698	0.695230857	0.838794646	0.237512967	28.675386	1.109688065	1.145955131	11.33554908	0.681444419	28.88943876	5.808454528	1151.09544	3.538859851	2.437924758	0.335753251	0.104158493	0.562833238	3.050760275	0.449706105	0.696814294	3.353948091	1.75935481	0.508095561	1.912138402	0.059126498	2.650319527	1.616158842	0.734246272	0.127749423
Z-HIP-182	IL15RA(+/-)	1.111986152	5.60552837	23.59849146	9.49784	0.924067192	12.3308677	0.597109204	31.07850753	0.15716223	1.183358306	0.24654289	0.064629948	24.64680598	39.25096064	0.658746516	0.480936126	101.3778941	29.09547221	421.3408933	1.306895925	0.694600192	0.585409726	0.212338943	25.70777772	0.824616414	1.090382048	7.347517598	0.469270475	20.98051607	4.122048589	648.5001463	2.46111082	3.131401034	0.337923886	0.158849699	0.849972941	1.926470192	0.341783203	0.553603218	2.428568033	1.314931184	0.387182696	1.773647201	0.084850755	2.019041867	1.649454208	0.485884176	0.204579753
Z-HIP-184	IL15RA(+/-)	1.161948162	6.096410944	28.15352275	13.06534222	1.110034958	15.53042865	0.705195362	36.85718287	0.206360425	1.312258164	0.335337639	0.070959297	31.94097997	53.82072841	0.961687633	0.563471638	141.0802335	41.775919	658.3372057	1.515100841	0.979075873	0.666820556	0.241999798	34.53128368	1.683363156	1.427153568	11.29888908	0.569950061	29.13302174	5.002850751	1022.431174	3.282958043	2.682374989	0.40419867	0.160245972	0.459890679	2.503814456	0.403825054	0.565702201	3.131800911	1.476798756	0.710502435	2.07469415	0.117570948	1.684752779	2.055048482	0.817113001	0.294740034
QC-1	QC	0.430593364	27.53013026	20.86537377	3.743862759	1.353891606	14.7435991	0.52799656	15.38186241	0.171514266	2.937044852	0.402832245	0.112241126	25.0955465	62.10609466	4.473606774	0.597403863	147.169386	47.3533607	499.4569657	1.231557903	1.635821577	1.097614017	0.330034762	35.82780068	1.386275	0.756372013	8.658609913	0.766313163	30.34684047	5.321359591	853.4006256	5.134537873	2.33309818	0.282798713	0.07930786	0.704692968	2.239533397	0.620294629	1.17842742	2.835090888	1.286813722	0.645934731	2.071269046	0.10868136	3.245247766	3.11778646	0.782681453	0.222429844
QC-2	QC	0.076387757	35.87779009	19.83756906	0.636898337	1.380291274	16.71605938	0.514464808	14.53962858	0.20395661	3.234904	0.389038203	0.09772477	24.24576377	63.1850471	2.085572019	0.646315658	145.9633525	46.51547452	468.8057571	1.07776113	1.916596544	1.18028363	0.272368798	35.13685143	1.497253477	0.685518278	8.457685568	0.710736507	29.06915283	5.323947154	814.6844389	5.150418736	2.276583286	0.255279941	0.078318163	0.717145919	2.257025604	0.614720758	1.087167486	2.877425458	1.264790499	0.60872933	1.847549712	0.086907213	3.150674327	2.789638429	0.80220937	0.168881146
QC-3	QC	0.232982859	33.25827736	20.34178357	0.691739468	1.313616999	16.99451155	0.509333043	14.71019186	0.215667464	3.210319229	0.405126715	0.131162248	24.93322642	63.24550329	1.821588092	0.617191659	147.8040945	47.1018484	479.1668335	1.199238405	1.695551909	1.057588938	0.322431195	34.85465326	1.20145429	0.682858383	8.476749227	0.076132717	29.41602832	5.536684709	814.1998698	5.17475825	2.35515155	0.238699104	0.080195923	0.748818536	2.455295258	0.575453833	1.169285635	2.8107448	1.352646166	0.641343578	1.835479943	0.088260311	3.337154479	3.221220576	0.776669736	0.230778047
QC-4	QC	0.205252386	30.69843487	20.04180382	0.664003726	1.318732966	16.99832113	0.520865948	14.82404299	0.129374373	3.318391034	0.3796049	0.120546383	25.21408773	64.12502291	1.893968907	0.619090354	148.3579077	46.68312589	493.1475446	1.178481643	1.614420003	1.153036688	0.31903057	35.16258871	0.787521084	0.730480627	8.6519246	0.682898571	30.27314789	5.872207449	817.8693951	5.14560022	2.374992856	0.29595319	0.091072785	0.786527867	2.531977974	0.615468635	1.204020206	2.788729663	1.391026518	0.526535968	1.844752649	0.126923217	3.340025386	2.855478346	0.772539794	0.195437186
QC-5	QC	0.533485582	23.80528984	20.90952602	6.711443245	1.537356464	12.20293865	0.506204898	15.55748264	0.114452441	2.559937333	0.415292174	0.119146155	24.72179936	58.72656869	6.61829474	0.550623572	142.3758023	46.50399781	496.6179887	1.219808568	1.514645232	1.072710157	0.34262123	35.73989802	1.946186672	0.811940954	8.406580694	0.974857309	29.84300819	4.847435025	868.7726626	4.936213708	2.301806229	0.27966974	0.064119969	0.596913836	1.959355367	0.700379303	1.243254436	2.779709861	1.286841684	0.690474378	2.234049181	0.107821592	3.171940142	3.427574396	0.725169851	0.21638318
QC-6	QC	0.627045987	20.0146928	20.76141392	6.738242973	1.285500376	12.25634331	0.549426379	15.73796016	0.217117779	2.520969335	0.390916024	0.102511801	25.00593619	59.96556024	6.749278975	0.575818725	144.9757713	47.2302104	509.0073556	1.279667454	1.529510593	0.994528815	0.357476399	35.85118595	0.848125153	0.806210768	8.615132202	1.009453256	30.60063752	4.824425213	870.654941	5.053035329	2.222475573	0.310864746	0.078907539	0.680239486	1.989976255	0.595408855	1.096562202	2.774137598	1.162476552	0.612918259	2.190129545	0.105827976	3.135187404	2.969360985	0.825302922	0.272365006
QC-7	QC	0.908405614	21.52629662	23.30014627	7.020848804	1.28785156	13.29342058	0.567684285	16.92186824	0.148516927	2.777748182	0.437015455	0.1023554	26.45246556	63.38886576	7.672937912	0.575383208	153.5393878	50.08550715	549.9963149	1.434390216	1.544205182	1.127535873	0.366280382	38.22162669	2.037109322	0.821223067	9.343587187	1.143800617	32.87906809	5.523457995	934.2224466	5.347200994	2.467579588	0.316325558	0.083232779	0.698512166	2.243569923	0.620336388	1.270274555	2.97979795	1.263100914	0.795606876	2.475653242	0.136347853	3.336504859	3.443446025	0.794197048	0.250734497
[truncated: 202 more columns]
