# Supplementary material for: Metabolic responses in the cortex and hippocampus induced by Il-15rα mutation
Source: Royal Society of Chemistry journal article supplement (doi:10.1039/d2mo00105e), 2022-08-02
Supplement: d2mo00105e4.pdf [file d2mo00105e4.pdf]

**Table S3.** Metabolites most associated with *Il-15ra* mutations

| Brain Region              | Metabolite                  | PubChem ID                      | KEGG ID | VIP <sup>a</sup> | Fold Change <sup>b</sup> | Adjusted <i>p</i> -value <sup>c</sup> |        |
|---------------------------|-----------------------------|---------------------------------|---------|------------------|--------------------------|---------------------------------------|--------|
| cortex                    | Threonic acid               | 151152                          | C01620  | 1.833            | 1.525                    | <0.001                                |        |
|                           | picolinic acid              | 1018                            | C10164  | 2.049            | 1.484                    | <0.001                                |        |
|                           | Dithioerythritol            | 439352                          | C00950  | 1.779            | 1.56                     | 0.003                                 |        |
|                           | glycolic acid               | 757                             | C03547  | 1.782            | 1.379                    | 0.004                                 |        |
|                           | myo-inositol                | 892                             | C00137  | 1.641            | 1.234                    | 0.004                                 |        |
|                           | 4-aminobutyric acid         | 223130                          | C00334  | 1.644            | 1.255                    | 0.006                                 |        |
|                           | Phosphoglycolic acid        | 529                             | C00988  | 1.578            | 4.11                     | 0.004                                 |        |
|                           | 1-Methylhydantoin           | 69217                           | C02565  | 1.659            | 1.262                    | 0.017                                 |        |
|                           | ascorbate                   | 3372                            | C00072  | 1.595            | 1.357                    | 0.019                                 |        |
|                           | pyrogallol                  | 1057                            | C01108  | 1.298            | 1.609                    | 0.003                                 |        |
|                           | Mono(2-ethylhexyl)phthalate | 20393                           | C03343  | 1.559            | 1.853                    | 0.015                                 |        |
|                           | 2,2-Dimethylsuccinic Acid   | 11701                           | C04067  | 1.656            | 0.356                    | 0.012                                 |        |
|                           | 1,2,4-Benzenetriol          | 10787                           | C02814  | 1.343            | 0.122                    | 0.011                                 |        |
|                           | 3-Aminoisobutyric acid      | 64956                           | C05145  | 2.074            | 0.524                    | 0.068                                 |        |
|                           | Dodecanol                   | 8193                            | C02277  | 2.038            | 0.401                    | 0.003                                 |        |
|                           | thymine                     | 1135                            | C00178  | 2.087            | 0.328                    | 0.006                                 |        |
|                           | 5-hydroxytryptophan         | 439280                          | C00643  | 1.859            | 0.148                    | 0.004                                 |        |
|                           | stearic acid                | 5281                            | C01530  | 2.306            | 0.541                    | 0.039                                 |        |
|                           | N-Methyl-L-glutamic acid    | 439377                          | C01046  | 1.973            | 0.354                    | 0.007                                 |        |
|                           | N-Oleoyldopamine            | 5282106                         | C12272  | 1.855            | 0.18                     | 0.012                                 |        |
|                           | D-galacturonic acid         | 84740                           | C08348  | 1.972            | 0.082                    | 0.001                                 |        |
|                           | Pyruvic acid                | 1060                            | C00022  | 1.982            | 0.053                    | 0.001                                 |        |
|                           | Arachidic acid              | 10467                           | C06425  | 2.249            | 0.025                    | <0.001                                |        |
|                           | methyl hexadecanoate        | 8181                            | C16995  | 2.403            | 0.135                    | <0.001                                |        |
|                           | Anandamide                  | 5281969                         | C11695  | 2.393            | 0.039                    | <0.001                                |        |
|                           | Hippocampus                 | O-Phosphorylethanolamine        | 1015    | C00346           | 1.961                    | 1.476                                 | <0.001 |
|                           |                             | glucose-6-phosphate             | 5958    | C00092           | 1.834                    | 1.896                                 | 0.006  |
|                           |                             | cycloleucine                    | 2901    | C03969           | 1.670                    | 0.595                                 | 0.014  |
|                           |                             | alpha-D-glucosamine 1-phosphate | 188960  | C06156           | 1.346                    | 0.500                                 | 0.014  |
|                           |                             | cholesterol                     | 5997    | C00187           | 1.833                    | 0.792                                 | 0.010  |
|                           |                             | Myristic Acid                   | 11005   | C06424           | 1.677                    | 0.676                                 | 0.013  |
|                           |                             | Acetol                          | 8299    | C05235           | 1.751                    | 0.350                                 | 0.027  |
| palmitic acid             |                             | 985                             | C00249  | 1.948            | 0.789                    | 0.015                                 |        |
| proline                   |                             | 145742                          | C00148  | 1.544            | 0.761                    | 0.004                                 |        |
| Gallic acid               |                             | 370                             | C01424  | 1.544            | 0.665                    | 0.015                                 |        |
| O-Phosphoserine           |                             | 68841                           | C01005  | 2.159            | 0.456                    | 0.032                                 |        |
| 3-Aminoisobutyric acid    |                             | 64956                           | C05145  | 2.078            | 0.473                    | 0.027                                 |        |
| 3-(1-Pyrazolyl)-L-alanine |                             | 151491                          | C01162  | 1.602            | 0.244                    | 0.018                                 |        |
| thymine                   |                             | 1135                            | C00178  | 1.990            | 0.374                    | 0.019                                 |        |
| 2-Butyne-1,4-diol         |                             | 8066                            | C02497  | 1.952            | 0.335                    | 0.004                                 |        |
| Dodecanol                 |                             | 8193                            | C02277  | 1.974            | 0.458                    | 0.008                                 |        |
| Erythrose                 |                             | 5460672                         | C01796  | 1.733            | 0.724                    | 0.001                                 |        |
| Orotic acid               |                             | 967                             | C00295  | 1.594            | 0.343                    | 0.001                                 |        |
| palmitoleic acid          |                             | 5312427                         | C08362  | 1.773            | 0.636                    | <0.001                                |        |
| lactulose                 |                             | 11333                           | C07064  | 1.808            | 0.074                    | <0.001                                |        |
| Arachidic acid            |                             | 10467                           | C06425  | 2.031            | 0.134                    | <0.001                                |        |
| 1,2,4-Benzenetriol        |                             | 10787                           | C02814  | 1.925            | 0.101                    | <0.001                                |        |
| stearic acid              |                             | 5281                            | C01530  | 2.144            | 0.564                    | 0.012                                 |        |
| L-Allothreonine           |                             | 99289                           | C05519  | 1.825            | 0.372                    | <0.001                                |        |
| trehalose-6-phosphate     |                             | 122336                          | C00689  | 2.106            | 0.502                    | <0.001                                |        |

<sup>a, b, c</sup> VIP, fold change and adjusted *p*-value are extracted from *Il-15ra*<sup>-/-</sup> vs wildtype set.

<sup>a</sup> VIP indicates the weight of each metabolite in the OPLS-DA model.

<sup>b</sup> Fold change is calculated as the expression ratio of *Il15ra*<sup>-/-</sup> mice to wildtype mice.

<sup>c</sup> Adjusted *p*-value is calculated through Kruskal-Wallis test and all-pairwise multiple comparisons.
